# Supplementary material for: A novel salt-controlled homogenous ionic liquid phase microextraction based on the salting out effect and optimization of the procedure using the experimental design methodology
Source: Royal Society of Chemistry journal article supplement (doi:10.1039/c3ay40944a), 2013-01-01

## Supporting Information

Fig. 1s: Response surface estimated from the Box-Behnken design for significant interaction effects such as: volume of MeOH vs extraction temperature

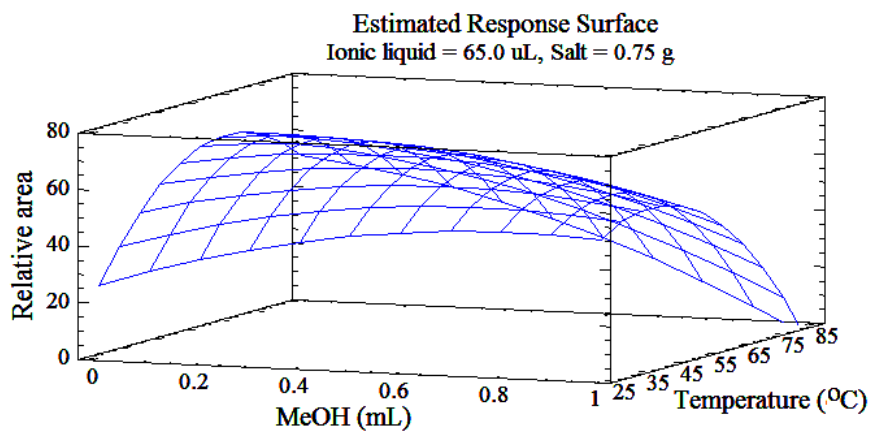

Fig. 2s: Response surface estimated from the Box-Behnken design for insignificant interaction effects such as a: volume of ionic liquid vs volume of methanol; b: volume of ionic liquid vs amount of salt

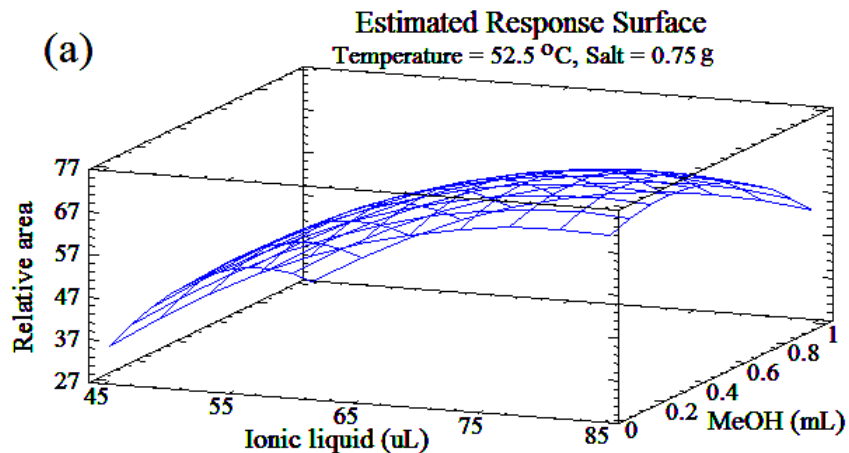

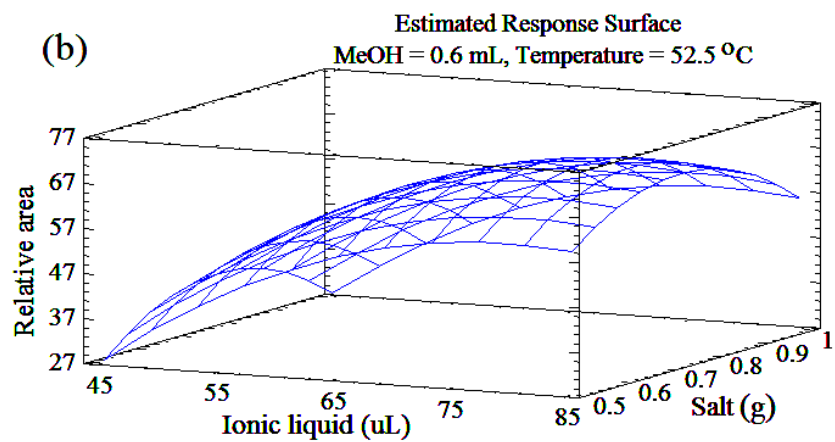

Supplement: c3ay40944a.pdf [file c3ay40944a.pdf]
